# Supplementary material for: Targeting radiation-resistant hypoxic tumour cells through ATR inhibition
Source: PubMed Central journal article supplement — Br J Cancer. 2012 Jun 19;107(2):291–9. doi: 10.1038/bjc.2012.265 (PMC3394988; doi:10.1038/bjc.2012.265), 2012-06-19
Supplement: bjc2012265x1.pdf [file bjc2012265x1.pdf]

## Supplementary Information

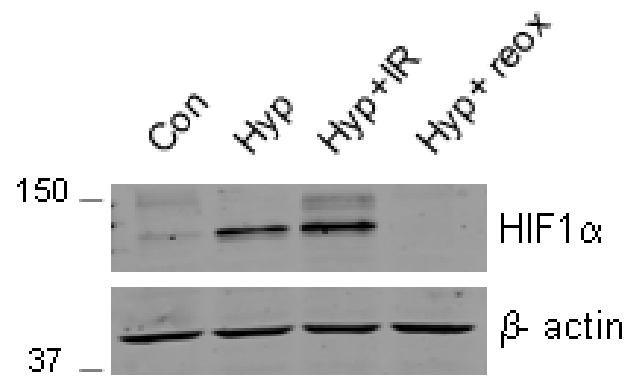

Figure S1 **Validation of methodology for irradiation in hypoxia.** RKO cells were exposed to either normoxia (Con) or hypoxia 2% O<sub>2</sub> for 16 hours and then treated as indicated: Con - cells harvested in normoxia; Hyp - cells harvested in hypoxia; Hyp + IR – cells placed in hypoxia box, transported to irradiator where they received a 4Gy dose and harvested 1 hour post irradiation; Hyp + Reox - Cells reoxygenated for one hour and then harvested. The sustained level of HIF-1α in the hypoxia/irradiated sample indicates that no reoxygenation took place during the irradiation process using the hypoxia box.

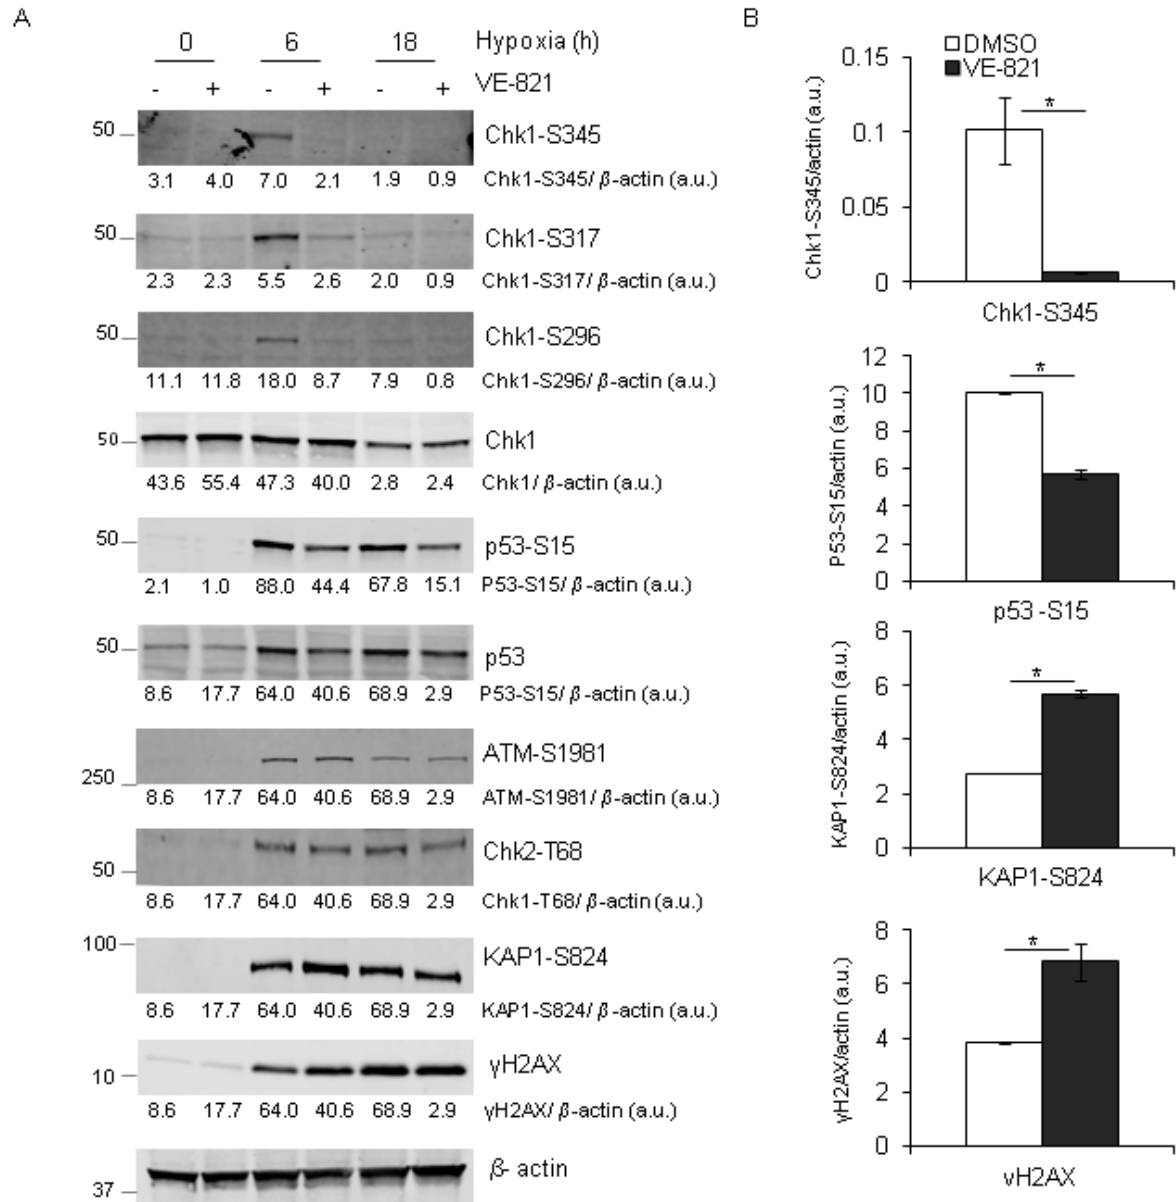

**Figure S2 Quantification of the effects of ATR inhibition of the severe hypoxic DDR kinetics.** RKO cells were exposed to  $\leq 0.02\%$   $O_2$  for the times indicated in the presence of DMSO/ $1 \mu\text{M}$  VE-821. (A) Semi-quantitative analysis of Western blots from Fig.3A (a.u. = arbitrary units of fold increase relative to  $\beta$ -actin). Representative blots of  $n=3$  experiments are shown. (B) Statistical analysis of the difference between the means of Chk1-S345, p53-S15, KAP1-S824 and  $\gamma$ H2AX for DMSO vs. VE-821. Significance values: \*  $p < 0.005$ .

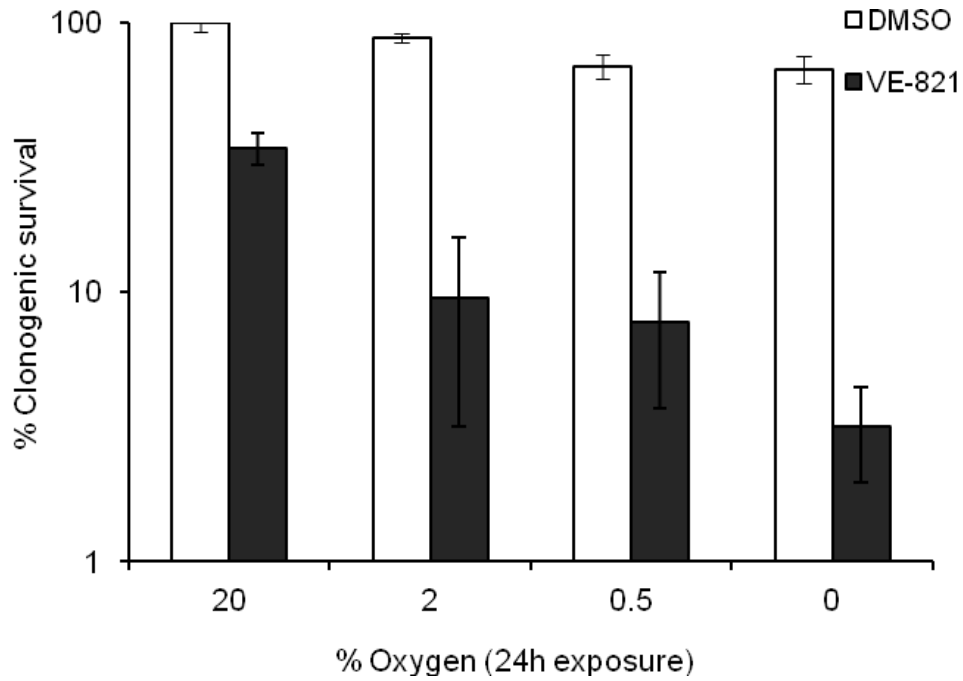

Figure S3 **VE-821 sensitises MDA-MB-231 cells to hypoxia.** Clonogenic assays were carried out using MDA-MB-231 cells in the presence of DMSO/1  $\mu$ M VE-821. Cells were exposed to 20%, 2% 0.5% and  $\leq 0.02\%$  O<sub>2</sub> for 24h and grown for 10 days. Graph depicts the sensitisation effect observed normalised to control (20% DMSO).

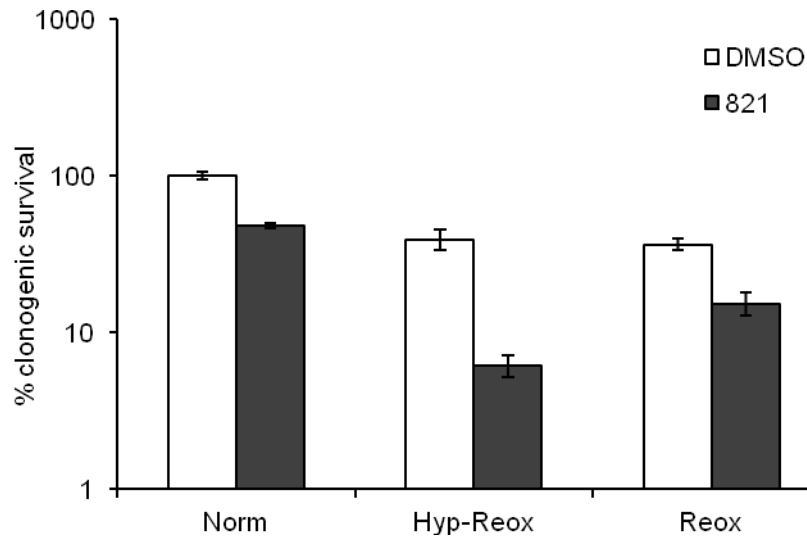

Figure S4 **Contribution of reoxygenation to the VE-821 dependent sensitisation to moderate hypoxia/reoxygenation.** Clonogenic assays were carried out using RKO cells in the presence of DMSO/1  $\mu$ M VE-821. DMSO/VE-821 were present in the media throughout the experiment in normoxia (Norm), in hypoxia/reoxygenation (Hyp-Reox - 24h at 2% O<sub>2</sub> followed by reoxygenation) or added just after reoxygenation (Reox). Colonies were then grown for 10 days.

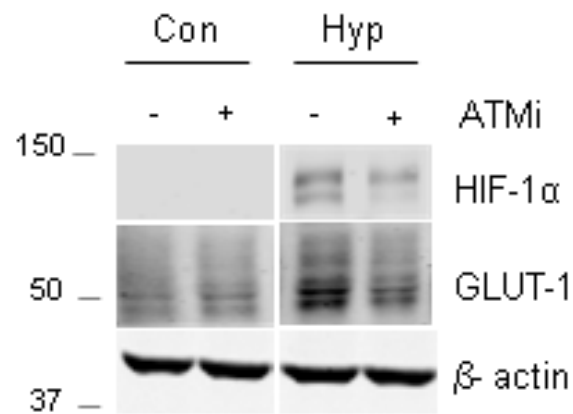

Figure S5 **ATM inhibition leads to reduced HIF1 levels.** RKO were treated with DMSO or 10  $\mu$ M ATMi and exposed to normoxia (Con) or 2% O<sub>2</sub> (Hyp) for 6h. Western blotting was carried out with the antibodies indicated. The levels of  $\beta$ -actin are shown as a loading control.

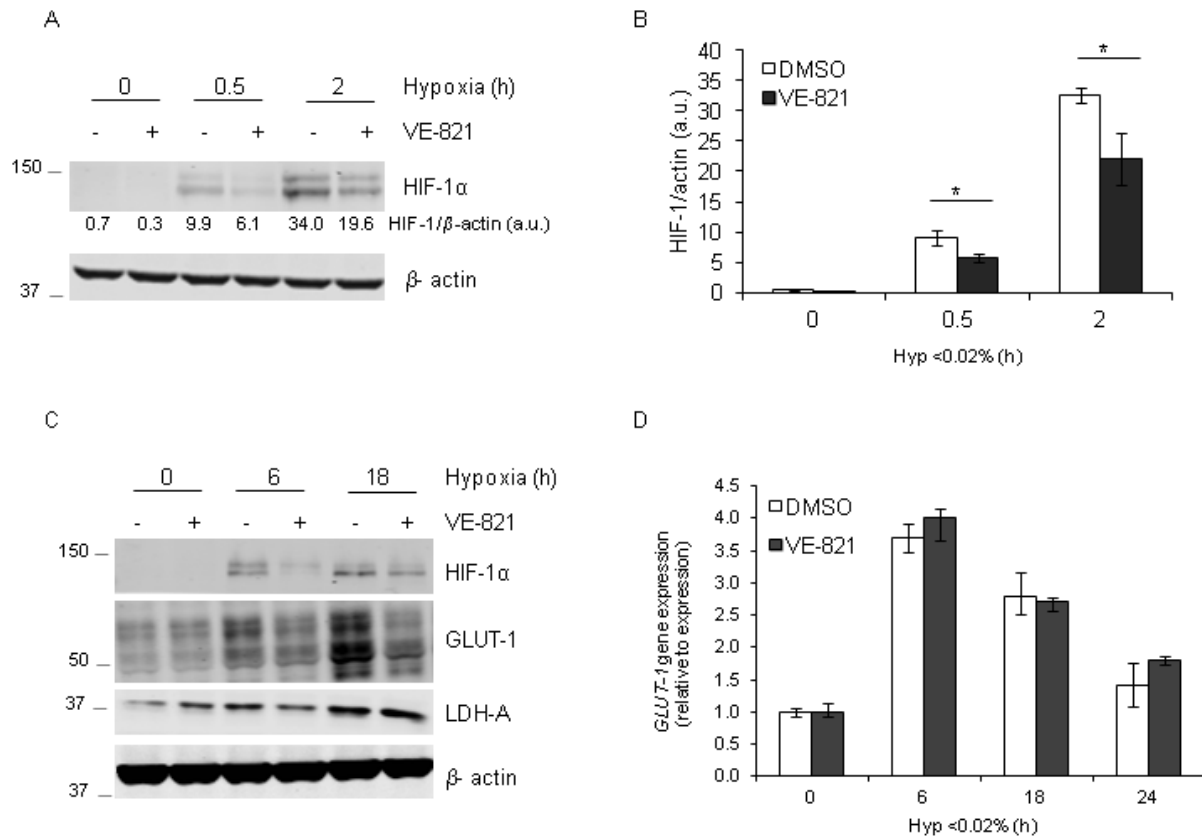

**Figure S6 VE-821 inhibition of HIF signalling is transient at the transcript level but not at the protein level.** RKO cells were exposed to  $\leq 0.02\%$   $O_2$  for the times indicated in the presence of DMSO/1  $\mu$ M VE-821. (A) Semi-quantitative analysis of Western blots from Fig.6A (a.u. = arbitrary units of fold increase relative to  $\beta$ -actin). (B) Statistical analysis of the difference between the means of HIF1- $\alpha$  for DMSO vs. VE-821 at the indicated times. Significance values: \*  $p < 0.05$ . (C) Western blotting was carried out for HIF-1 $\alpha$ , GLUT-1, LDH-A and  $\beta$ -actin (loading control). Representative blots of  $n=3$  experiments are shown. (D) The levels of *GLUT-1* mRNA were determined by qRT-PCR. *18S* was used as the control.

A

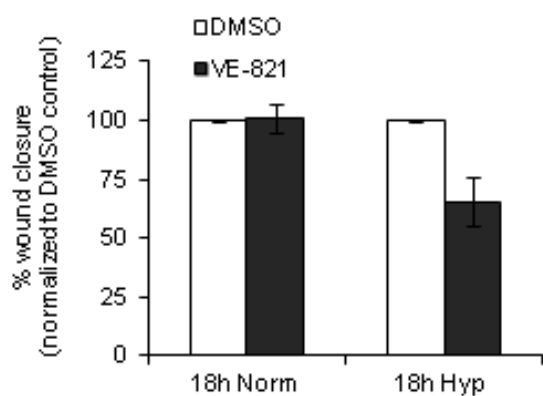

B

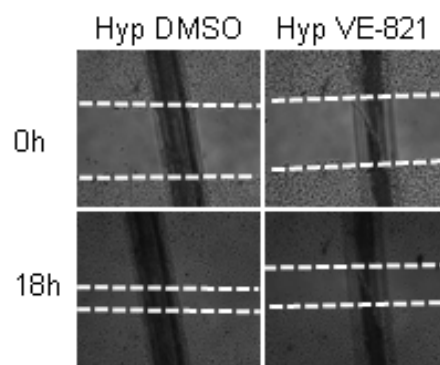

Figure S7 **Effect of VE-821 on cell motility in normoxic vs. hypoxic**

**conditions.** MDA-MB-231 cells were treated with DMSO/1  $\mu$ M VE-821 and scratch wound assays were performed. (A) The graph represents the percentage of wound closure after 18h normoxia/hypoxia ( $\leq 0.02\%$  O<sub>2</sub>). (B) Representative scratch wounds.
